# Supplementary material for: New Insights on the Vibrational Dynamics of 2-Methoxy-, 4-Methoxy- and 4-Ethoxy-Benzaldehyde from INS Spectra and Periodic DFT Calculations
Source: MDPI journal article supplement (doi:10.3390/ma14164561), 2021-08-13

# New insights on the vibrational dynamics of 2-methoxy-, 4-methoxy- and 4-ethoxy-benzaldehyde from INS spectra and periodic DFT calculations

Paulo J.A. Ribeiro-Claro <sup>1</sup>, Pedro D. Vaz <sup>2</sup>, Mariela Nolasco <sup>1,\*</sup>, Francisco P.S.C. Gil <sup>3</sup>, Luís A.E. Batista de Carvalho <sup>4</sup>, M. Paula M. Marques <sup>4,5</sup> and Ana M. Amado <sup>4</sup>

## Supplementary Material

**Figure S1.** *INS spectra of 2-methoxybenzaldehyde (a), 4-methoxybenzaldehyde (b) and 4-ethoxybenzaldehyde (c) up to 4000 cm<sup>-1</sup>.*

**Figure S2.** *Discrete (G09) and periodic (CASTEP) INS spectra of 2-methoxybenzaldehyde (a), 4-methoxybenzaldehyde (b) and 4-ethoxybenzaldehyde (c) up to 900 cm<sup>-1</sup>, compared with the experimental spectrum.*

**Figure S3.** *Experimental and calculated INS spectra for 4-ethoxybenzaldehyde*

**Figure S4.** *Experimental and calculated Far-IR spectra for 4-ethoxybenzaldehyde*

**Figure S1. (a)** *2-methoxybenzaldehyde*

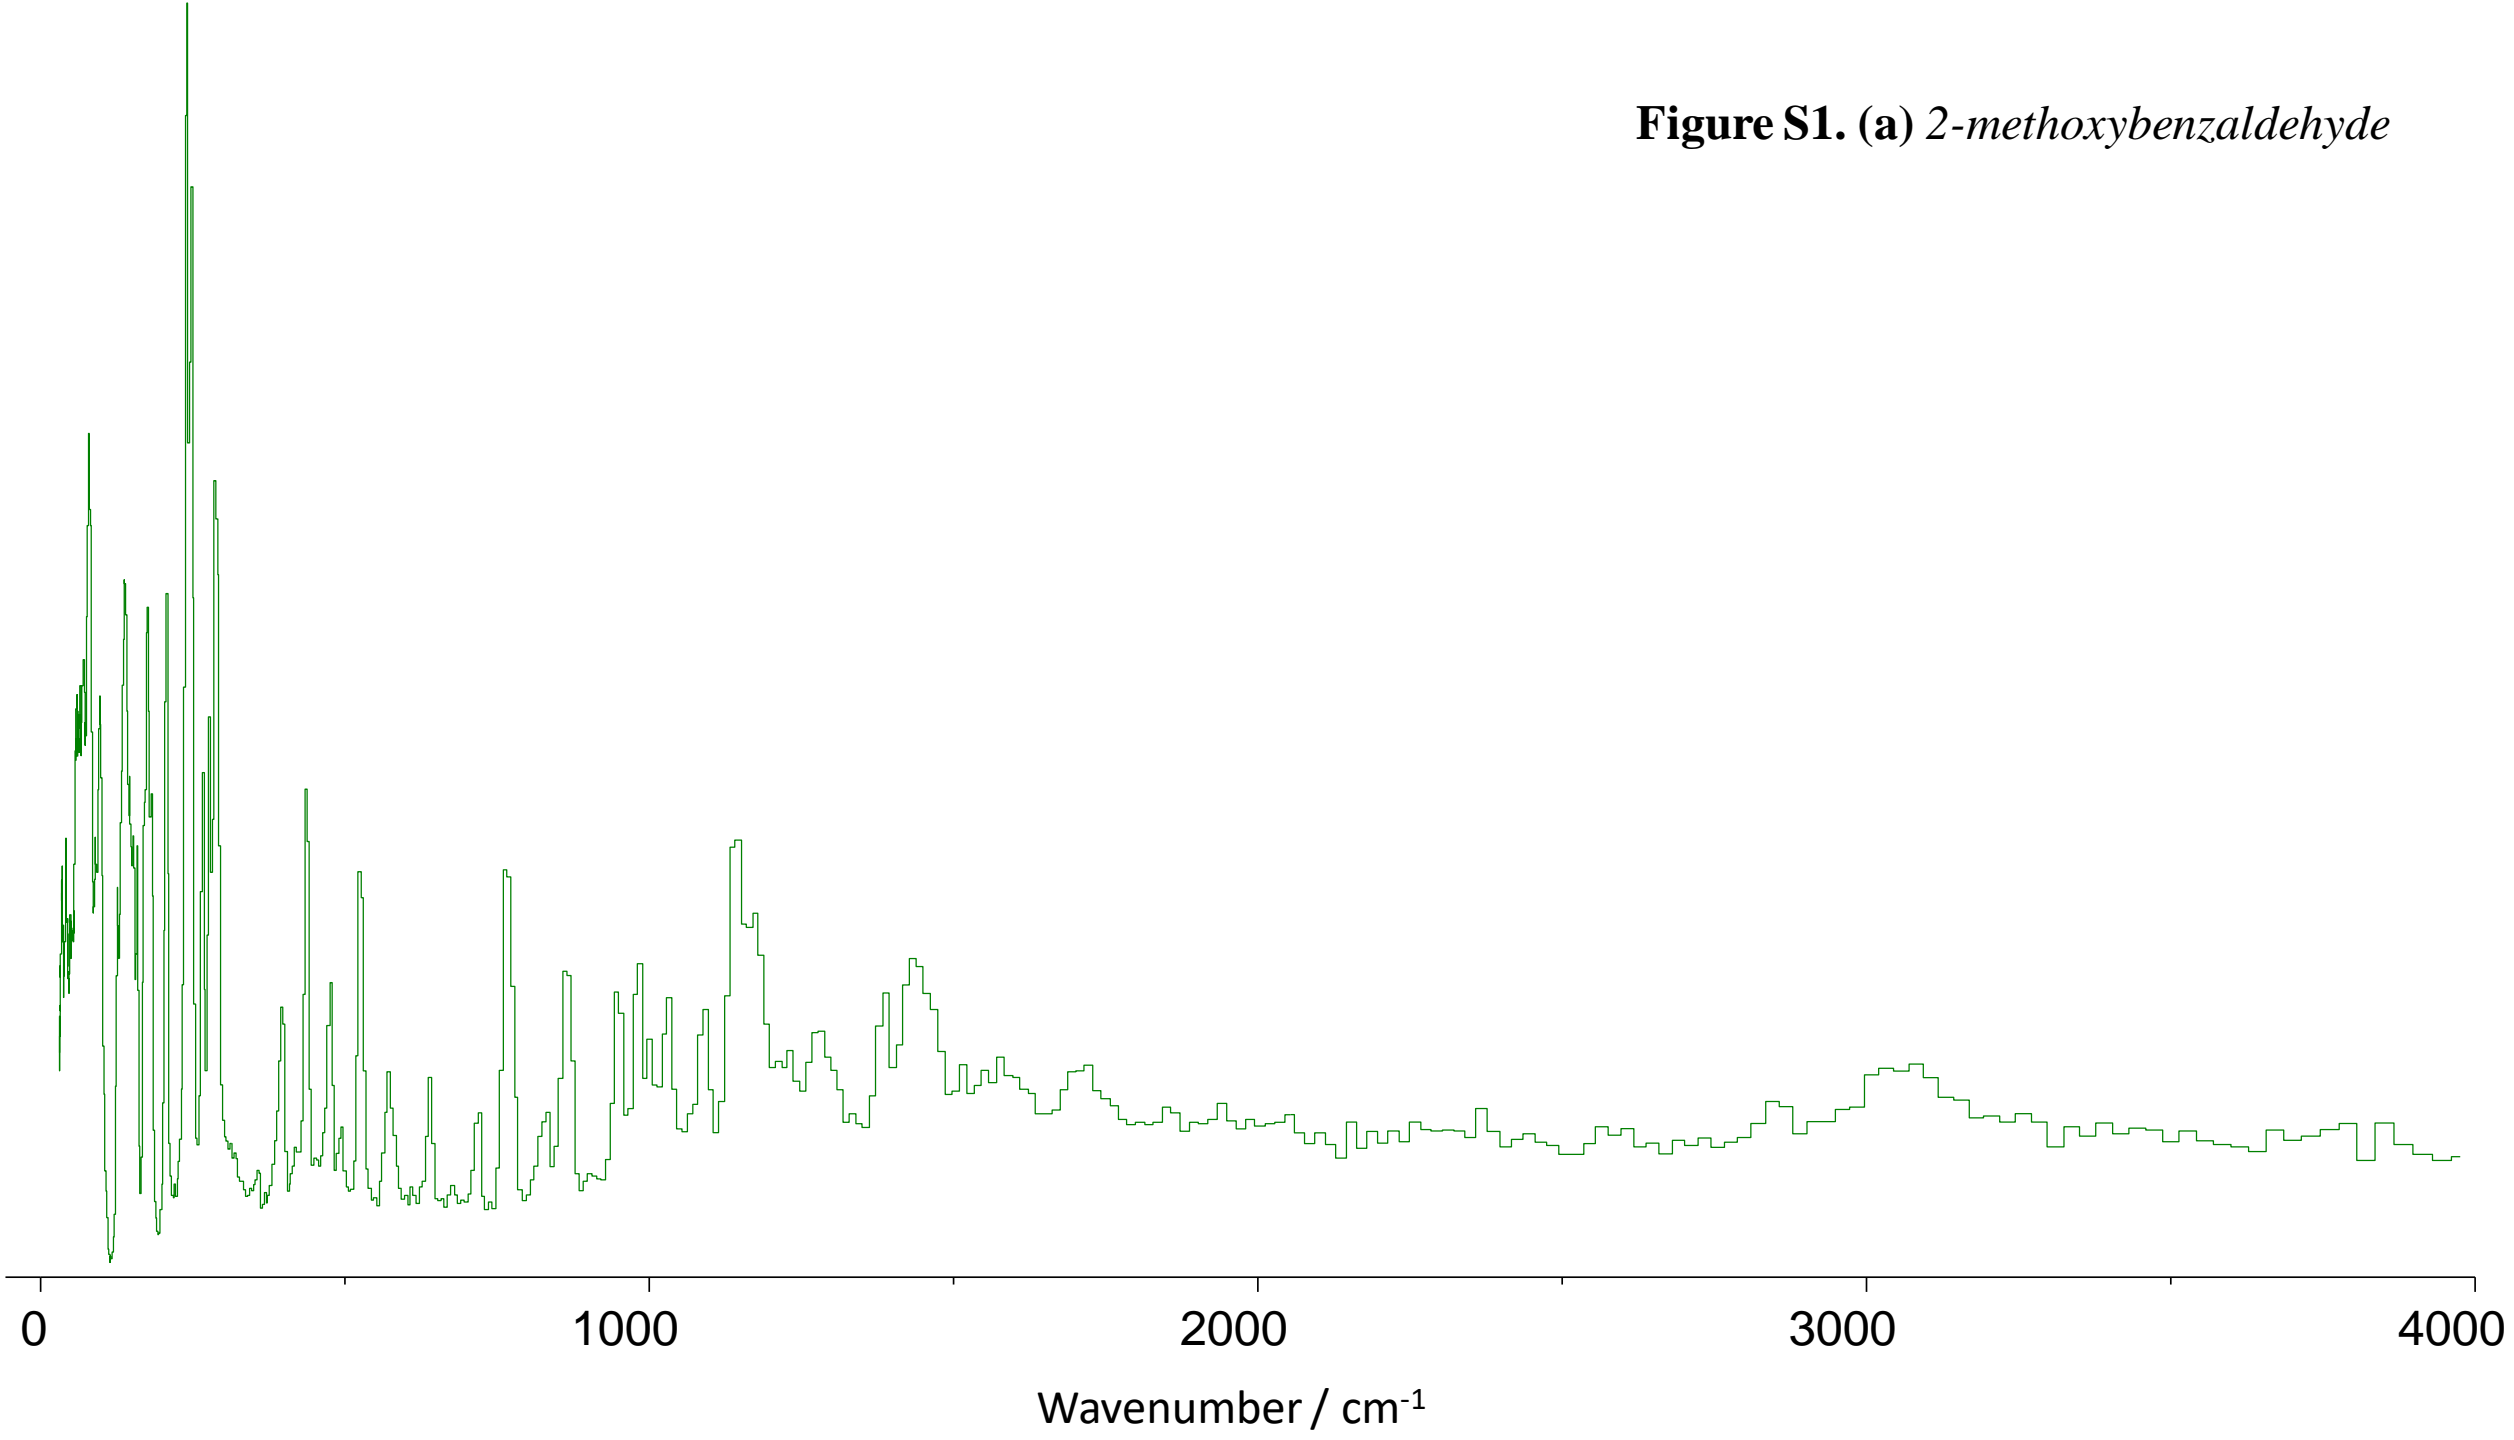

**Figure S1. (b)** *4-methoxybenzaldehyde*

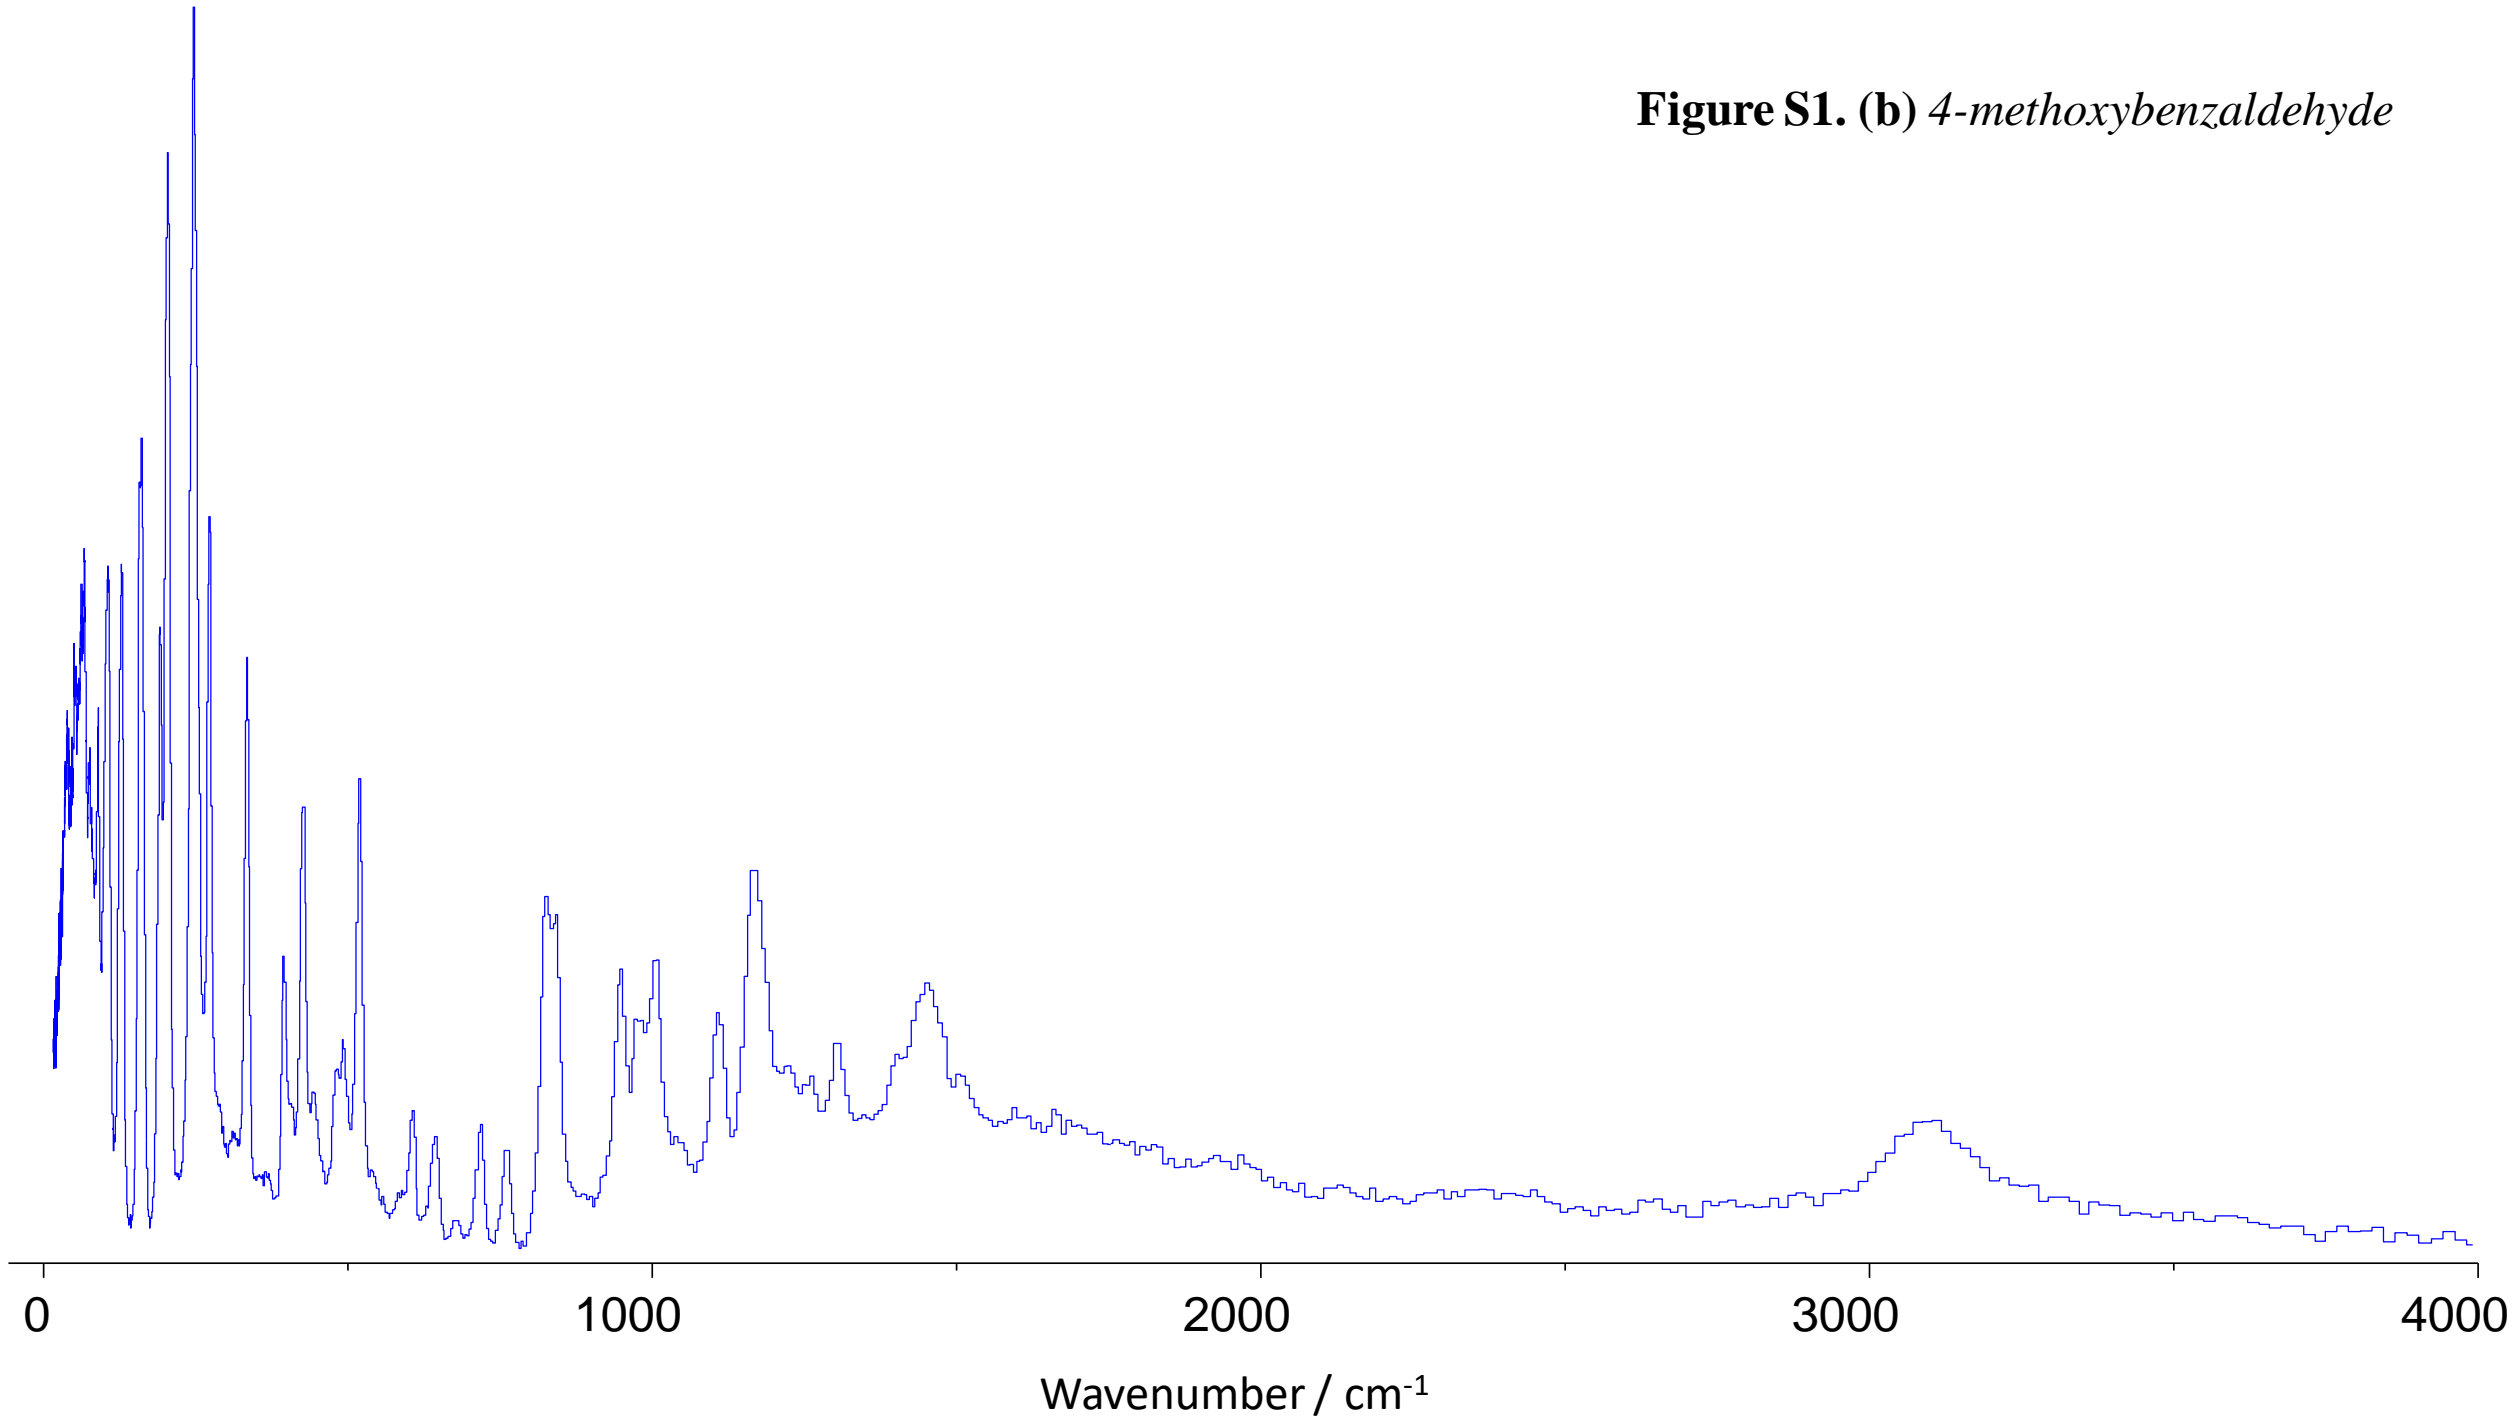

**Figure S1. (c)** *4-ethoxybenzaldehyde*

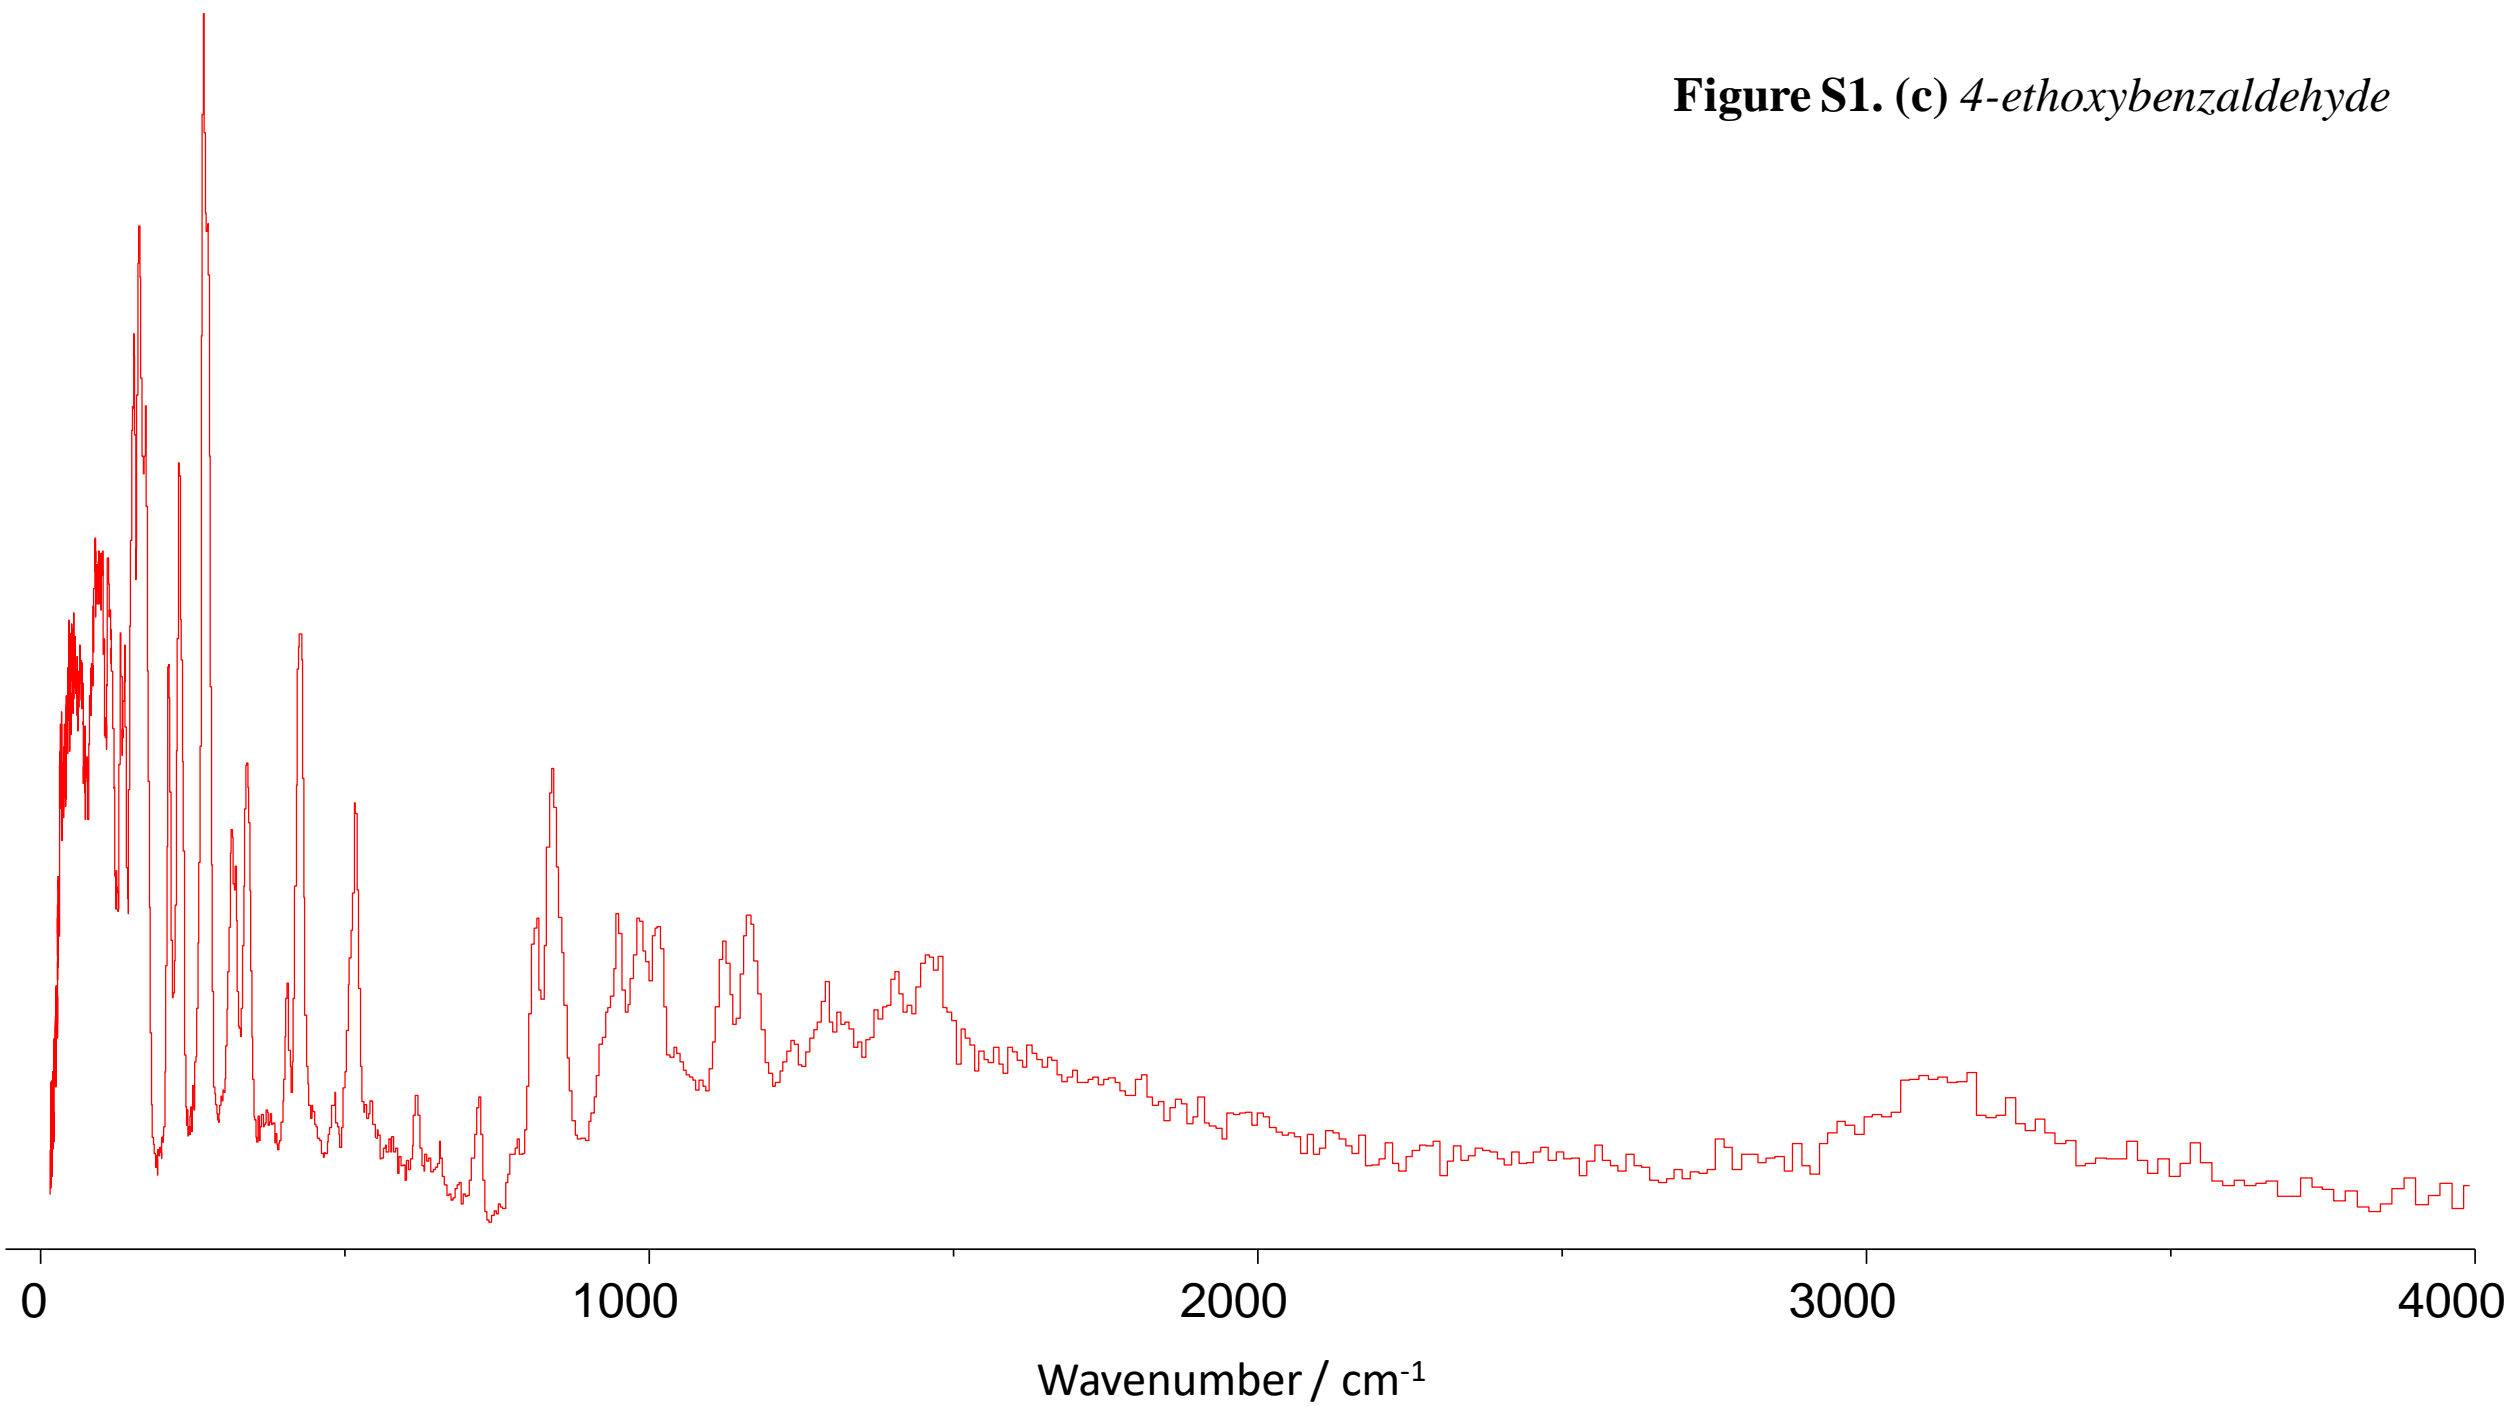

**Figure S2. (a)** *2-methoxybenzaldehyde*

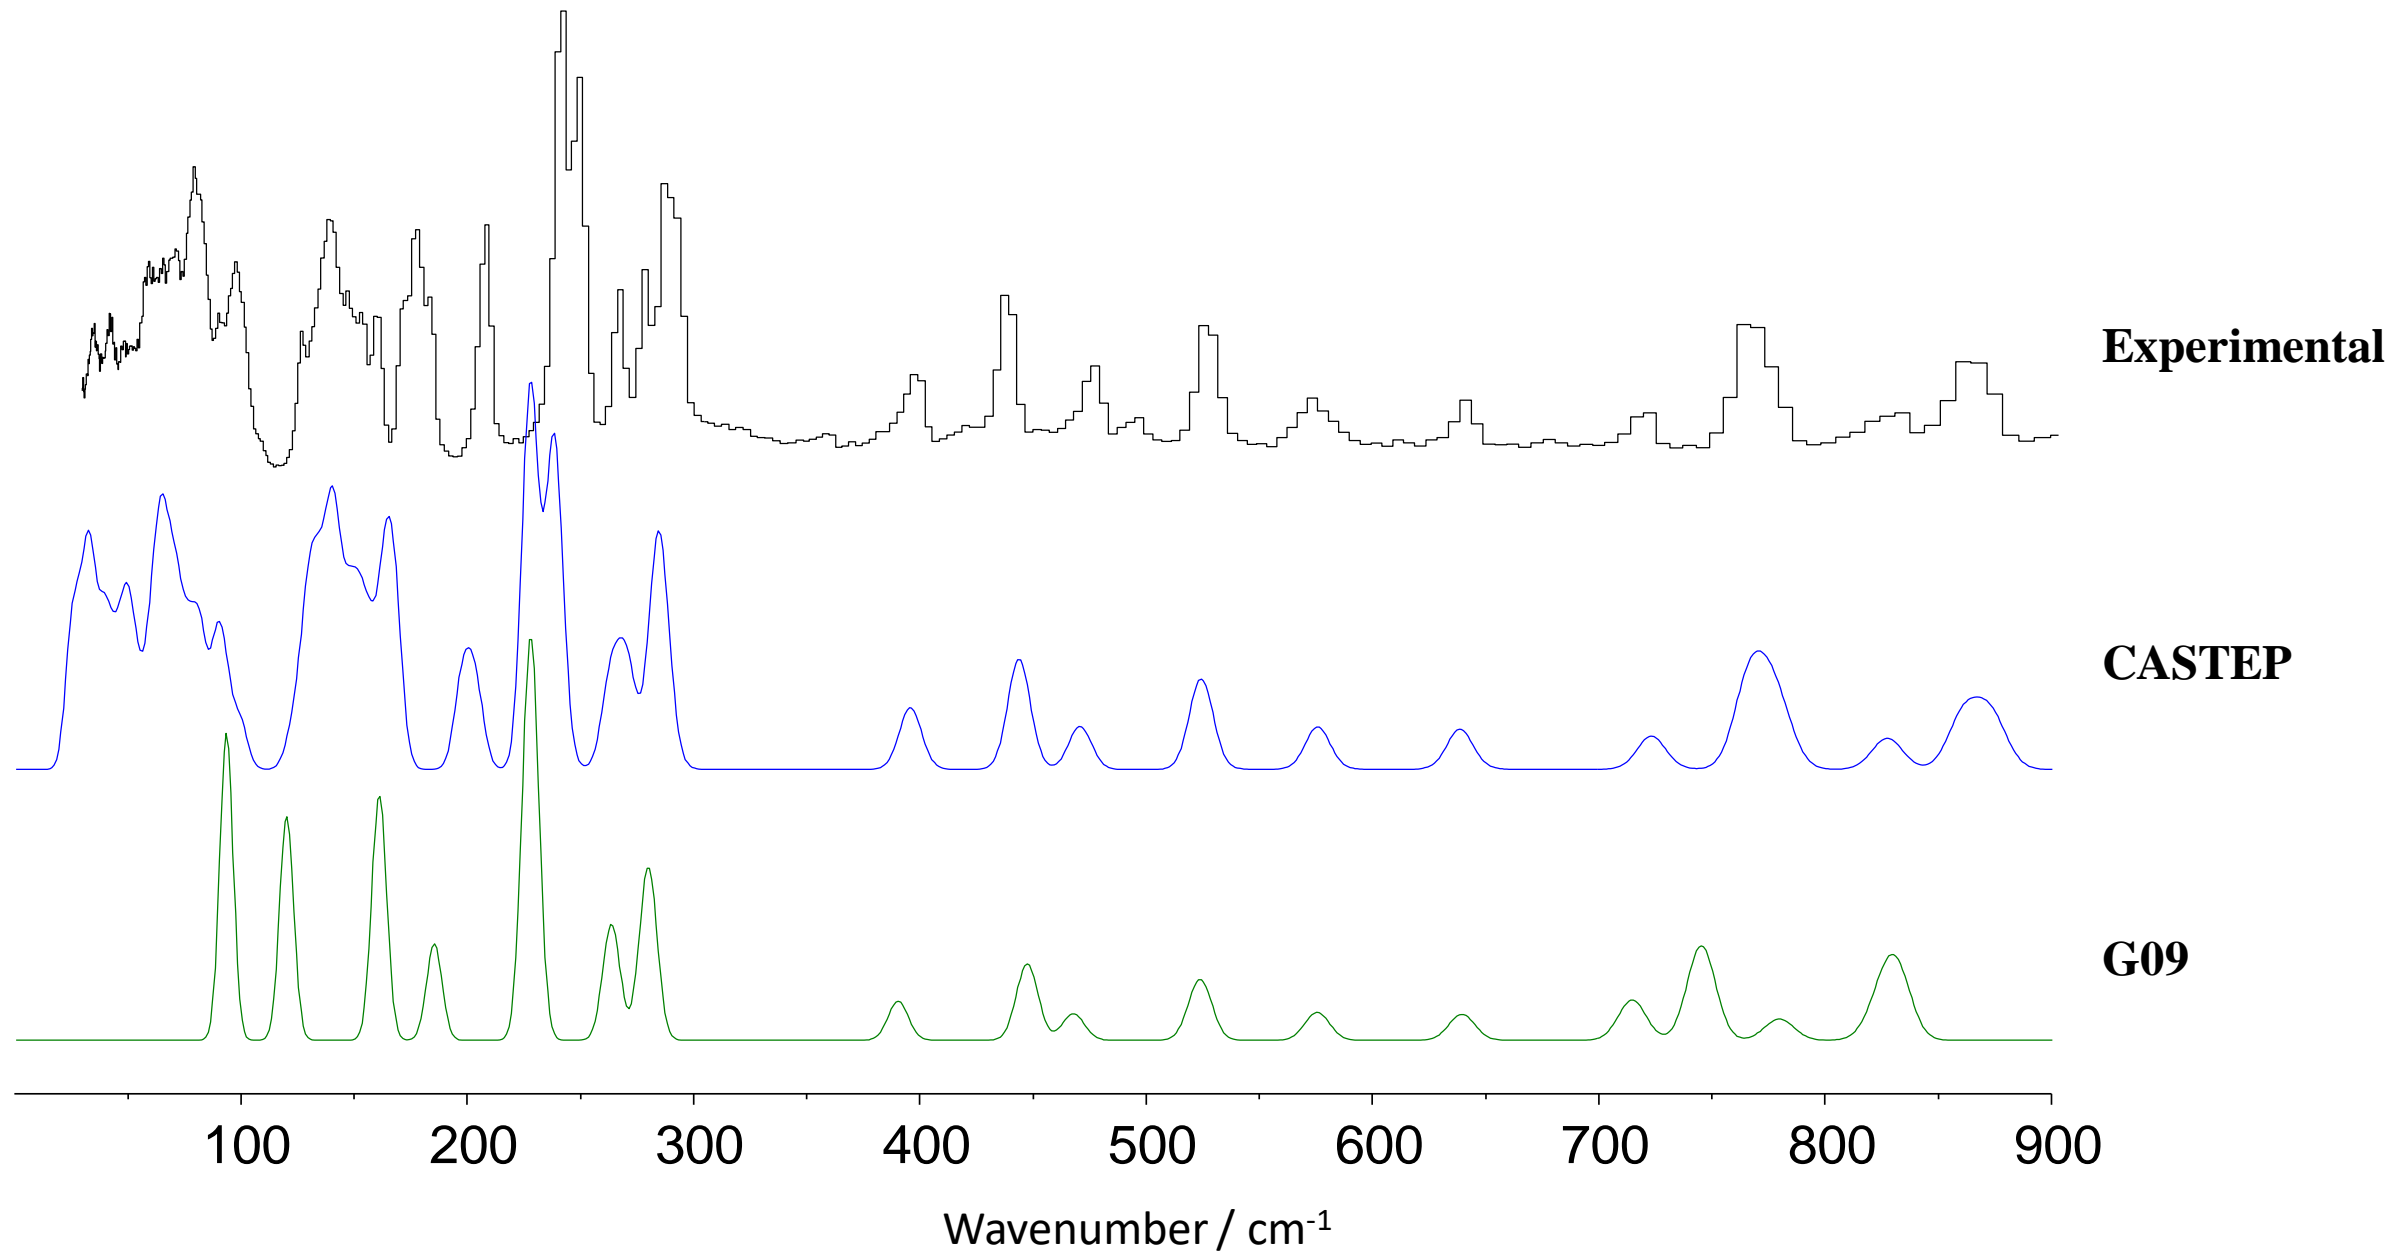

**Figure S2. (b)** *4-methoxybenzaldehyde*

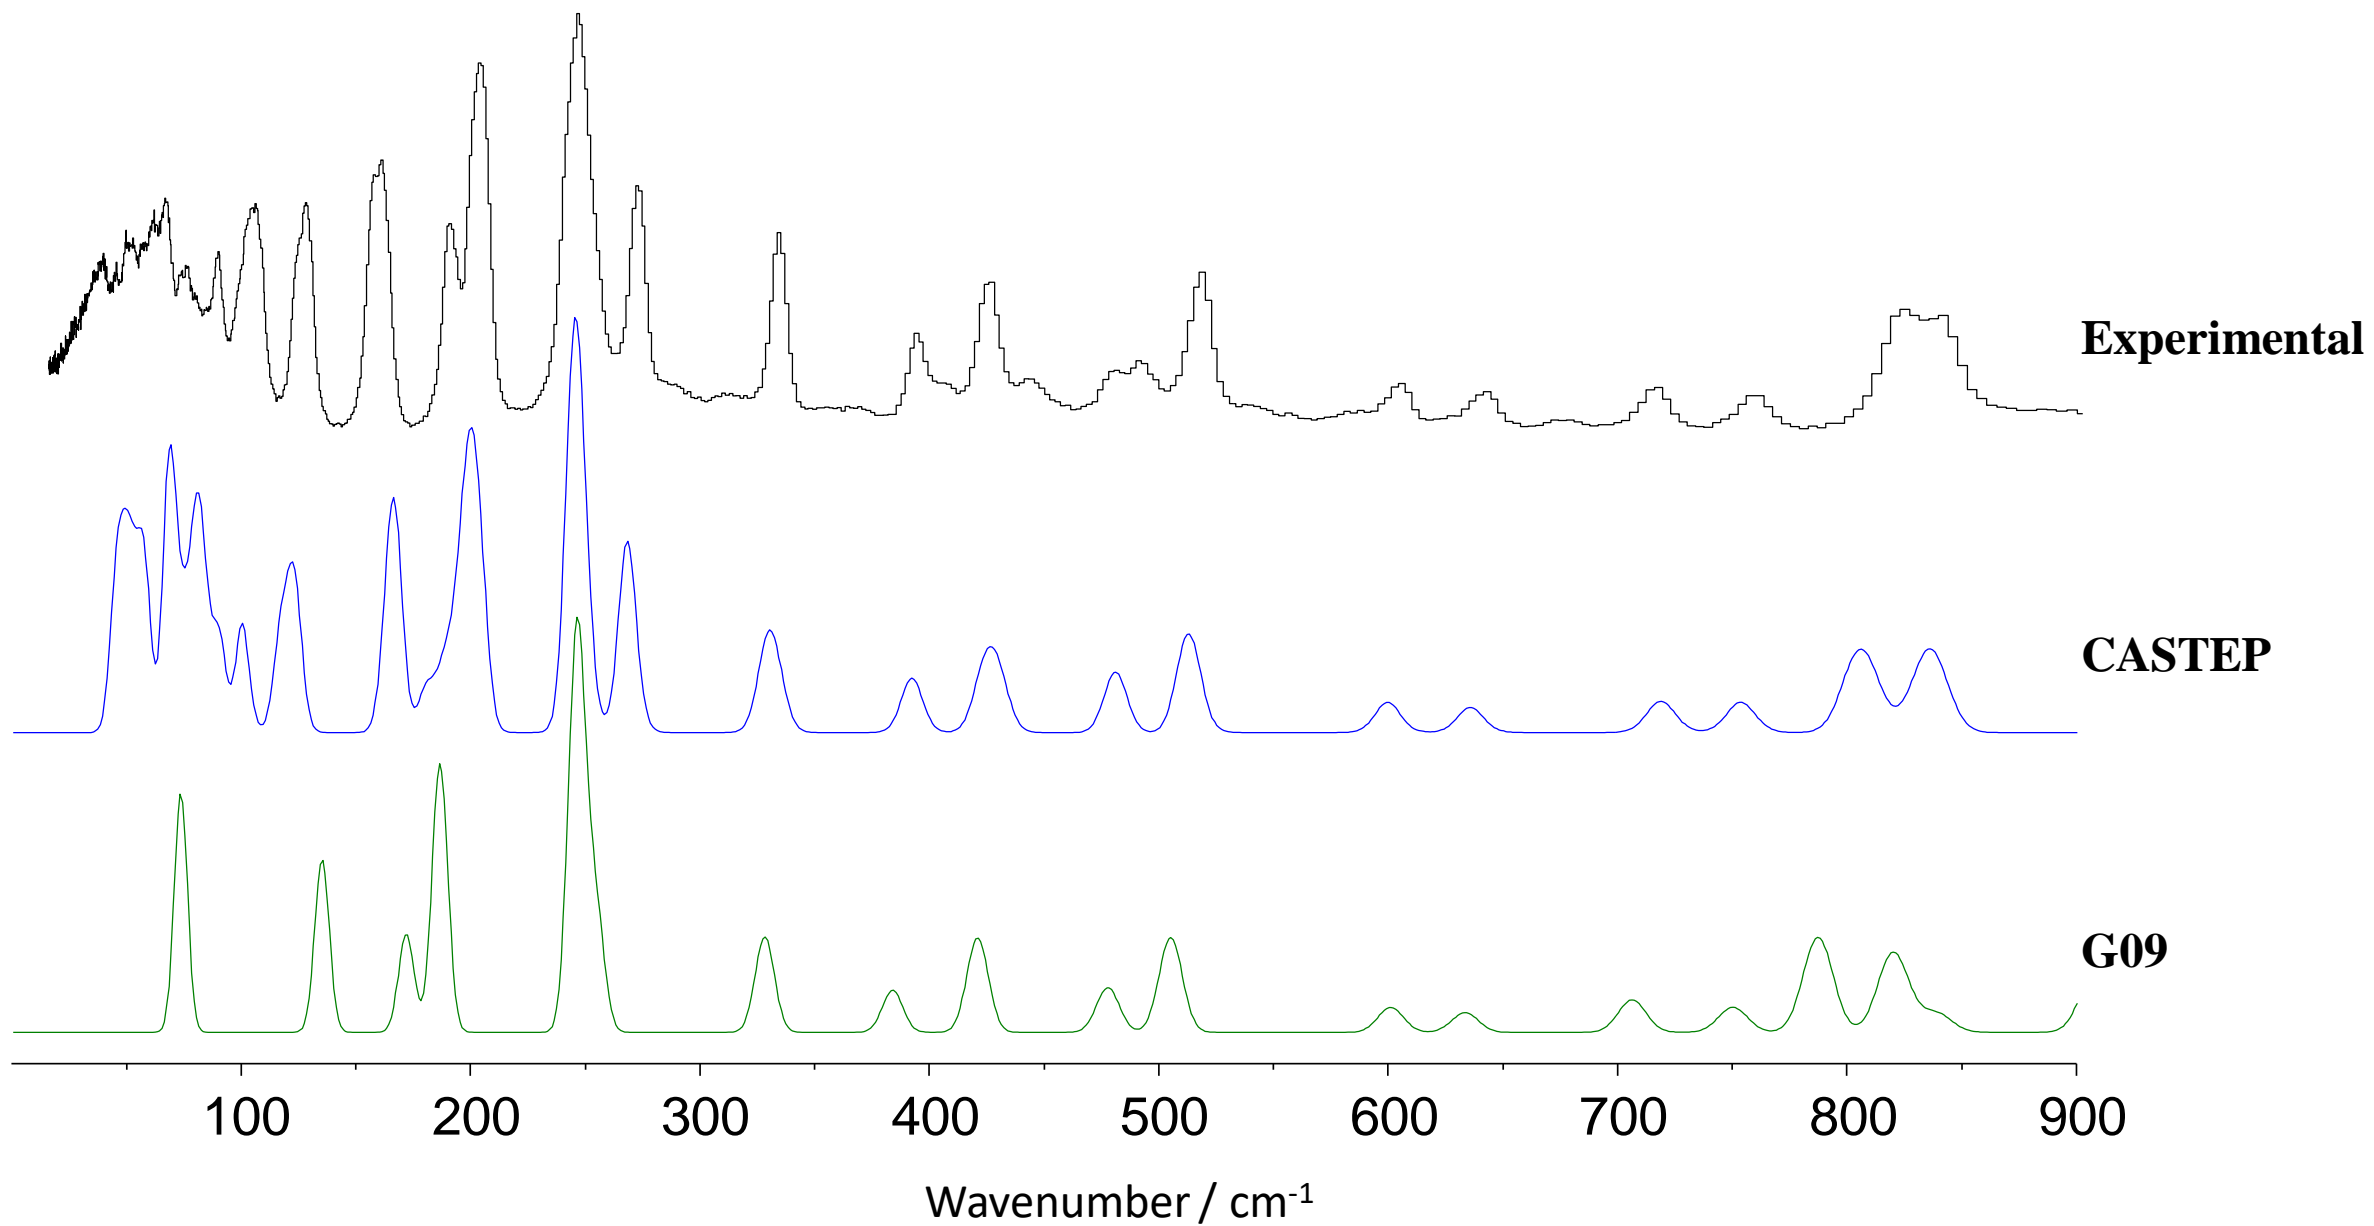

**Figure S2. (c)** *4-ethoxybenzaldehyde*

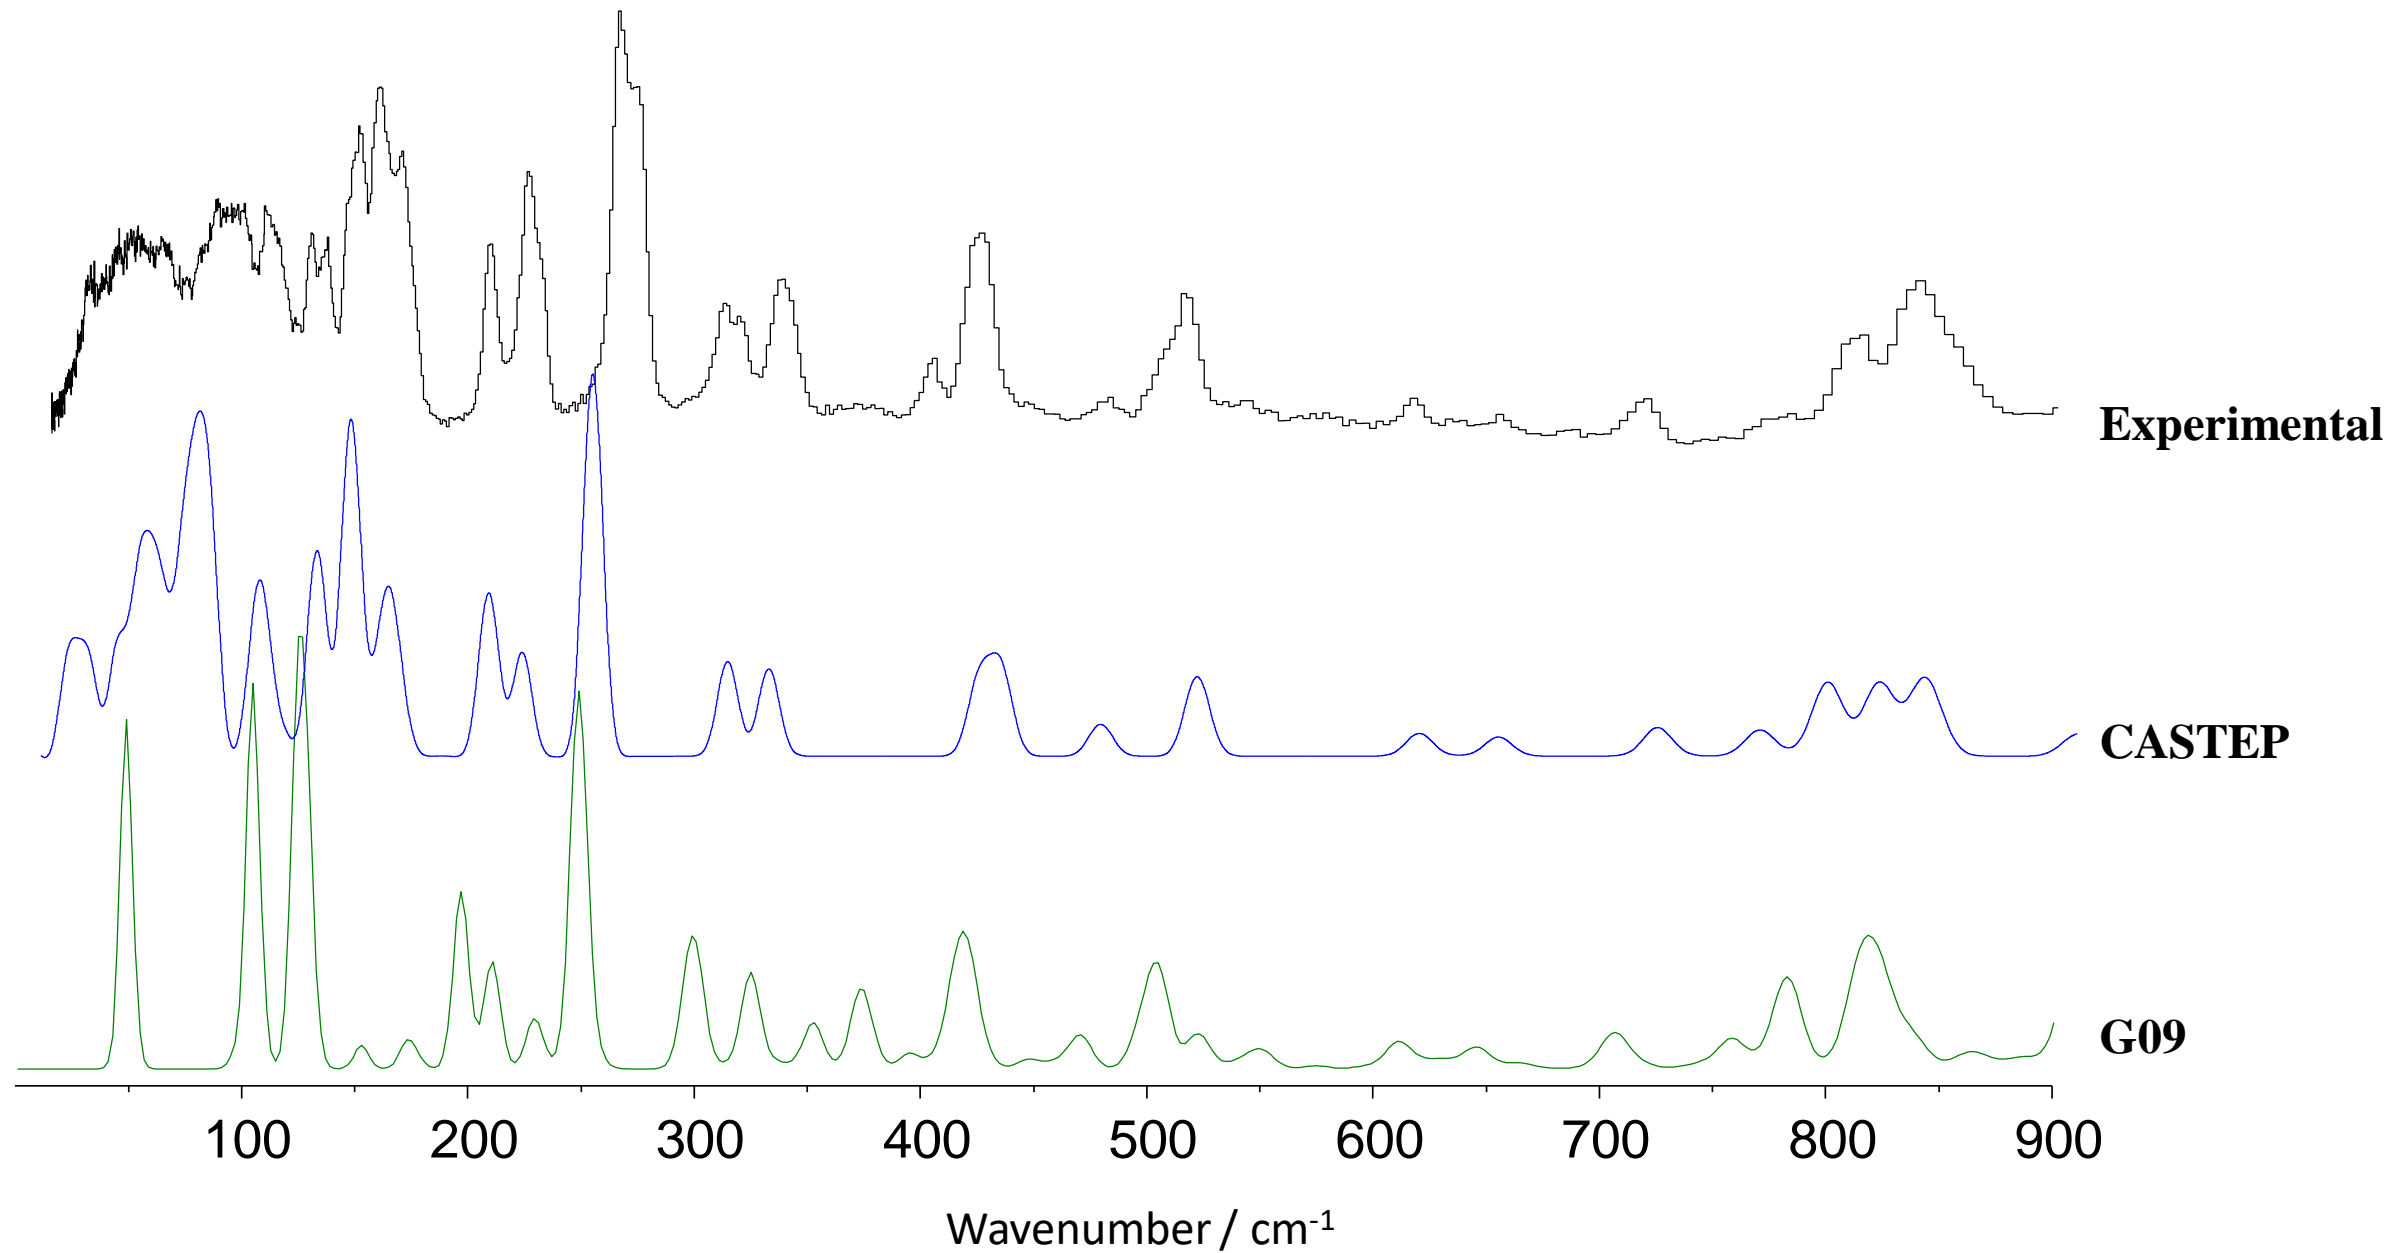

**Figure S3.** *Experimental and calculated INS spectra for 4-ethoxybenzaldehyde*

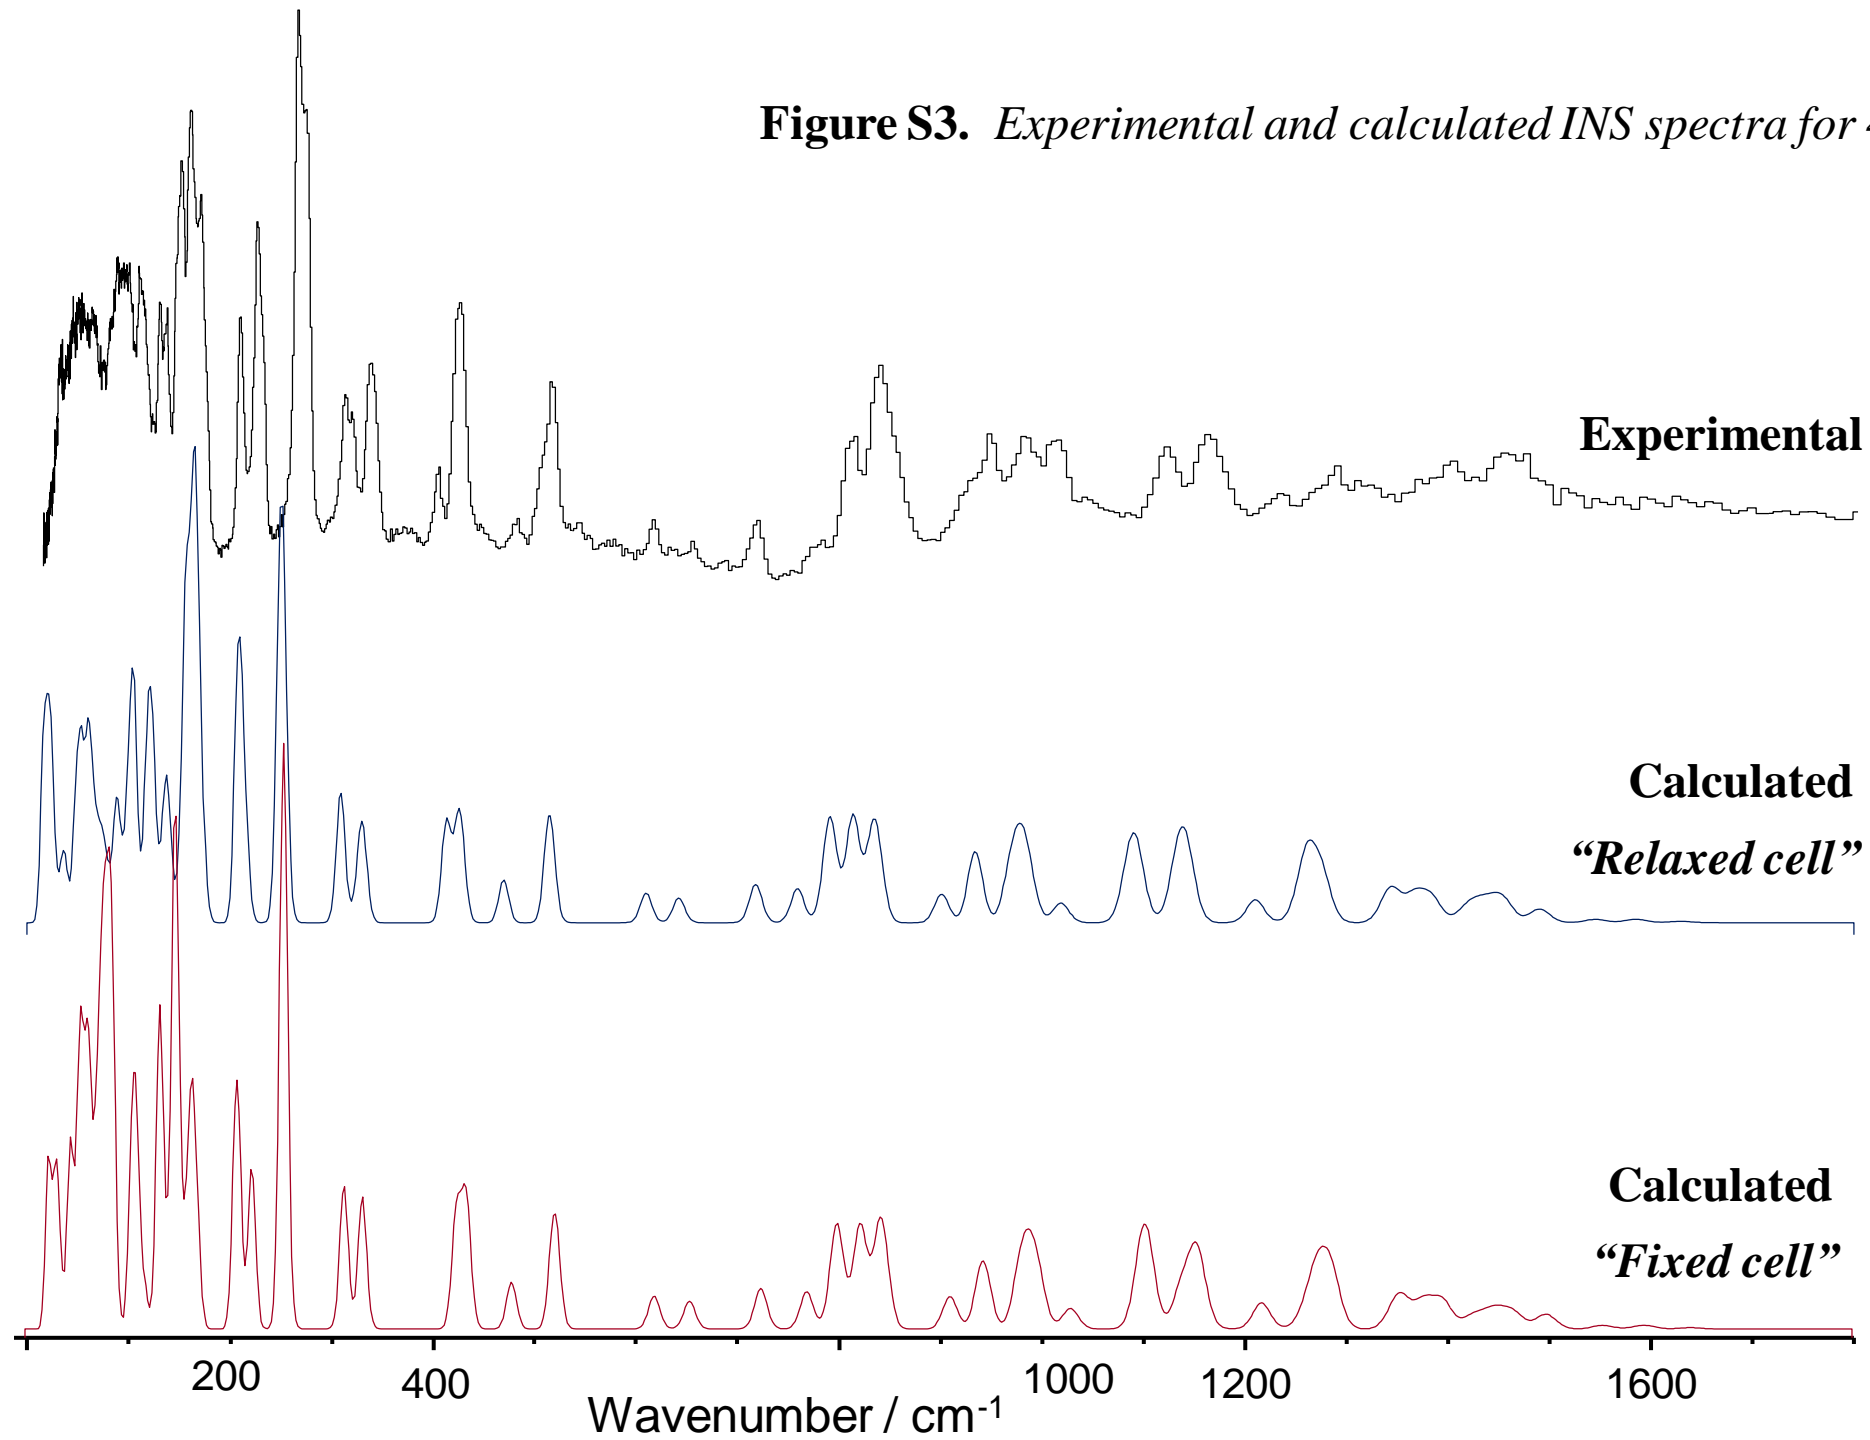



**Figure S4.** *Experimental and calculated Far-IR spectra for 4-ethoxybenzaldehyde*

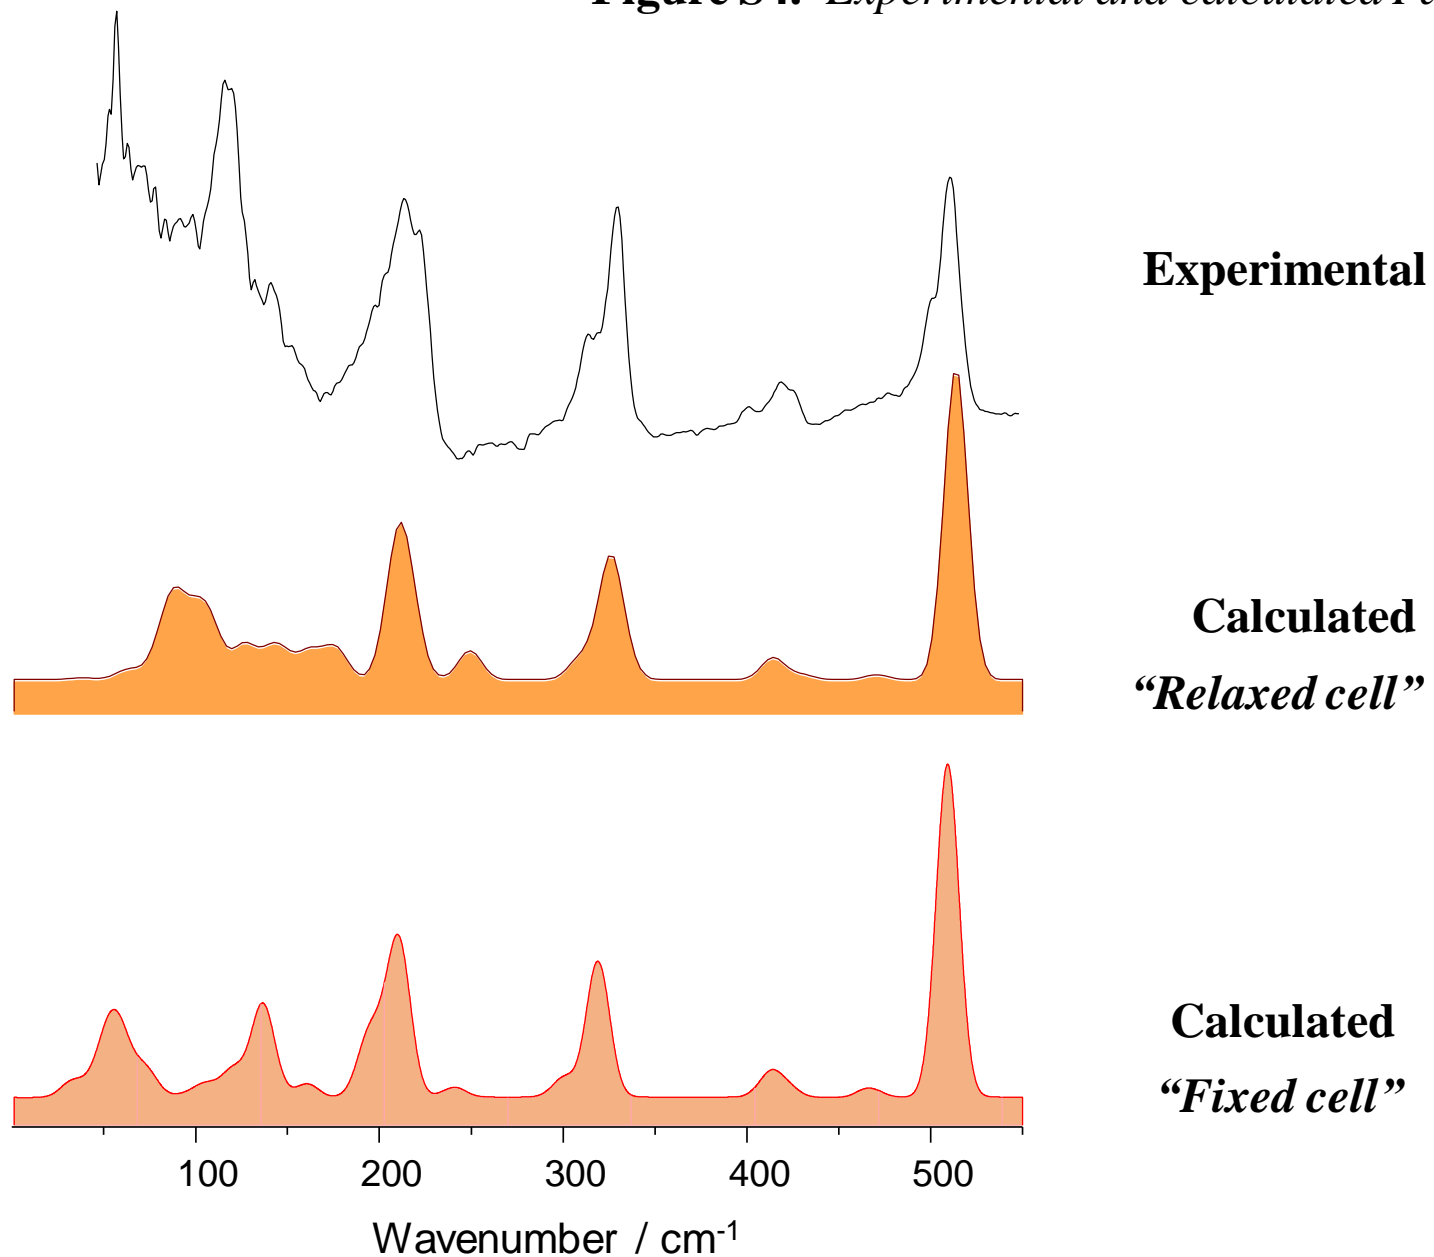

Supplement: s1 [file s1]
